# Supplementary material for: Combined headspace single-drop microextraction and solid-phase microextraction for the determination of phenols as their methyl ethers by gas chromatography-mass spectrometry
Source: Royal Society of Chemistry journal article supplement (doi:10.1039/c7ay02275a), 2017-01-01
Supplement: c7ay02275a1.pdf [file c7ay02275a1.pdf]

**ELECTRONIC SUPPLEMENTARY INFORMATION FOR THE PAPER**

**Combined headspace single-drop microextraction and solid-phase  
microextraction for the determination of phenols as their methyl ethers by  
gas chromatography-mass spectrometry**

Archana Jain, Soumitra Soni, Kishan Reddy-Noone, Aradhana K.K.V. Pillai and Krishna K. Verma\*

Department of Chemistry, Rani Durgavati University, Jabalpur 482001, Madhya Pradesh,  
India

\* Corresponding author

Tel.: +91 761 2605103.

**E-mail: [arichna@sancharnet.in](mailto:arichna@sancharnet.in)** (Krishna K. Verma)

**ORCID**

Krishna K. Verma: 0000-0003-2223-3027

**Table S1** The analytical features of merit of methods based on different strategies of derivatization and extraction in the determination of phenols by GC

| Derivatizing reagent/reaction scheme                                                                                                            | Detection technique | Matrix (phenolics)                                     | Extraction/derivatization method                                                                                          | Linear range/<br>(LOD; S/N = 3)                               | Ref. |
|-------------------------------------------------------------------------------------------------------------------------------------------------|---------------------|--------------------------------------------------------|---------------------------------------------------------------------------------------------------------------------------|---------------------------------------------------------------|------|
| None                                                                                                                                            | GC-FID              | Water (phenol, and chlorophenols)                      | SPME (polyaniline film electrodeposited on the platinum wire inserted into the needle of homemade syringe); 15 mL sample. | 0.05-5 mg L <sup>-1</sup><br>(0.69-3.7 µg L <sup>-1</sup> )   | 1    |
| None                                                                                                                                            | GC-MS               | Human urine (chlorophenols)                            | In-syringe dispersive µ-SPE using carbon fibres; 10 mL sample.                                                            | 1-1000 µg L <sup>-1</sup><br>(0.1-0.9 µg L <sup>-1</sup> )    | 2    |
| None                                                                                                                                            | GC-MS               | Bio-mass combustion smoke (alkyl- and methoxy-phenols) | HS-SPME (CW-DVB, 65 µm); 5 mL of total 100 mL impinger extract used for SPME.                                             | 2-30 µg L <sup>-1</sup><br>(1.1-4.2 µg L <sup>-1</sup> )      | 3    |
| Benzoyl chloride<br>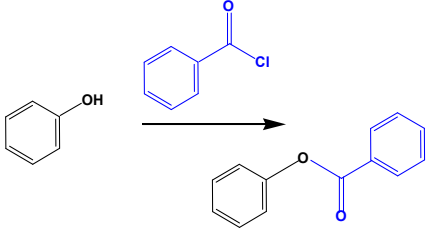                                           | GC-MS               | Water (phenol, nitro- and chlorophenols)               | Multi-valve SPE of benzoates (PS-DVB, 8 µm); 1 µL of 200 µL extract injected. Sample 80 mL.                               | 0.1-100 µg L <sup>-1</sup><br>(8-90 ng L <sup>-1</sup> )      | 4    |
| <i>N,O</i> -Bis(trimethylsilyl)trifluoroacetamide (BSTFA)<br> | GC-MS/MS            | Human urine (chlorophenols)                            | SPE (PS-DVB, 100 mg); 2 mL aqueous sample; 1 µL of 50 µL extract injected.                                                | 0.1-32 µg L <sup>-1</sup><br>(0.01-0.03 µg L <sup>-1</sup> )  | 5    |
| Trimethylsilyl- <i>N,N</i> -dimethylcarbamate                                                                                                   | GC-MS               | Water (phenol, alkyl- and chlorophenols)               | SPE (hypercrossed linked PS-DVB); 100 mL sample; 2.5 mL of extract concentrated to 1 mL, 10 µL injected.                  | 0.001-25 mg L <sup>-1</sup><br>(0.05-100 ng L <sup>-1</sup> ) | 6    |

|                                                                                                                                                                                                                                                                                                                        |        |                                                                                |                                                                                                                                                                                                                           |                                                                        |   |
|------------------------------------------------------------------------------------------------------------------------------------------------------------------------------------------------------------------------------------------------------------------------------------------------------------------------|--------|--------------------------------------------------------------------------------|---------------------------------------------------------------------------------------------------------------------------------------------------------------------------------------------------------------------------|------------------------------------------------------------------------|---|
| 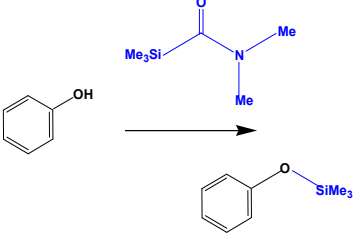 <p>Reaction of phenol with N,N-dimethyl-N-(trimethylsilyl)acetamide (DMA) to form trimethylsilyl phenyl ether.</p>                                                                                                                   |        |                                                                                |                                                                                                                                                                                                                           |                                                                        |   |
| <p><i>tert</i>-Butyldimethylsilyl-<i>N</i>-methyltrifluoroacetamide</p>  <p>Reaction of phenol with <i>tert</i>-butyldimethylsilyl-<i>N</i>-methyltrifluoroacetamide (TBSM) to form <i>tert</i>-butyl dimethylsilyl phenyl ether.</p> | GC-MS  | Sewage influent and effluent (alkylphenols, parabens, phenylphenol, bisphenol) | SPE (Oasis MAX); 1 L sample; 1 $\mu$ L of final 1 mL extract injected.                                                                                                                                                    | 0.01-10 $\mu$ g L <sup>-1</sup><br>(0.01-0.1 $\mu$ g L <sup>-1</sup> ) | 7 |
| <p><i>N,O</i>-Bis(trimethylsilyl)acetamide</p>  <p>Reaction of phenol with <i>N,O</i>-bis(trimethylsilyl)acetamide (BSTFA) to form trimethylsilyl phenyl ether.</p>                                                                  | GC-MS  | Water (chlorophenols)                                                          | SDME (2.5 $\mu$ L of hexyl acetate); in-syringe silylation by drawing the 0.5 $\mu$ L of reagent into the same syringe, sealing by placing GC septum at needle tip, and heating; 3 mL sample; the whole mixture injected. | 0.05-50 $\mu$ g L <sup>-1</sup><br>(4-61 ng L <sup>-1</sup> )          | 8 |
| 2,3,4,5,6-Pentafluorobenzyl bromide (PFBBr)                                                                                                                                                                                                                                                                            | GC-ECD | Wastewater irrigated soil (pentachloro-phenol)                                 | LLE (10 g soil extracted with 100 mL hexane and acetone, 1:1 v/v); extract concentrated to 1 mL, and 1 $\mu$ L injected.                                                                                                  | 5-1000 $\mu$ g L <sup>-1</sup><br>(0.4 $\mu$ g L <sup>-1</sup> )       | 9 |

|                                                                                                           |        |                                                   |                                                                                                                                                                       |                                                                |    |
|-----------------------------------------------------------------------------------------------------------|--------|---------------------------------------------------|-----------------------------------------------------------------------------------------------------------------------------------------------------------------------|----------------------------------------------------------------|----|
| 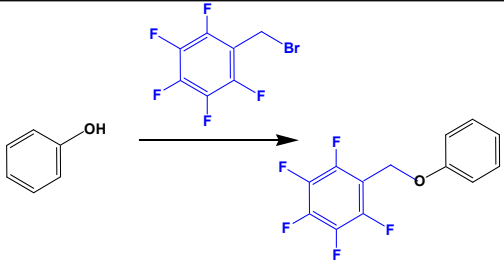                         |        |                                                   |                                                                                                                                                                       |                                                                |    |
| <p>Methyl iodide</p>     | GC-FID | Water (phenol, methyl-, chloro- and nitrophenols) | LLE (tetraalkylammonium bromide as phase transfer catalyst, and 1 mL of dichloromethane); 45 min reaction at 65°C; extract concentrated to 200 µL, and 2 µL injected. | 250-760 µg L <sup>-1</sup><br>(0.5-12 µg L <sup>-1</sup> )     | 10 |
| <p>Acetic anhydride</p>  | GC-ECD | Water (chlorophenols)                             | CSDFME; 10 mL aqueous sample; 0.5 µL of 11 µL extract injected.                                                                                                       | 0.01-300 µg L <sup>-1</sup><br>(0.005-0.5 µg L <sup>-1</sup> ) | 11 |
| Acetic anhydride                                                                                          | GC-ECD | Water (Chlorophenols)                             | Dispersive LLME; 5 mL aqueous sample; 0.5 µL of 10 µL extract injected.                                                                                               | 0.02-400 µg L <sup>-1</sup><br>(0.01-2 µg L <sup>-1</sup> )    | 12 |
| Acetic anhydride                                                                                          | GC-ECD | Wine (chloro- and bromophenols)                   | Dispersive LLME (150 µL of carbon tetrachloride in 1.3 mL of acetone, and reagent); 5 mL sample; 0.5 µL of extract injected.                                          | 10-500 ng L <sup>-1</sup><br>(2.2-5.3 ng L <sup>-1</sup> )     | 13 |
| Acetic anhydride                                                                                          | GC-ECD | Water (chlorophenols)                             | Coupled HF-LLLME and SPME; 5 mL aqueous sample.                                                                                                                       | 0.001-500 µg L <sup>-1</sup><br>(0.4-120 ng L <sup>-1</sup> )  | 14 |
| Acetic anhydride                                                                                          | GC-MS  | Water (phenol, methyl- and chlorophenols)         | HS-SPME (PDMS, 100 µm and CAR-PDMS, 74 µm); 5 mL sample.                                                                                                              | 0.08-13.3 µg L <sup>-1</sup><br>(0.3-18 ng L <sup>-1</sup> )   | 15 |
| Acetic anhydride                                                                                          | GC-MS  | Water (bromo- and chlorophenols)                  | HS-SPME (CAR-PDMS, 75 µm); 10 mL sample.                                                                                                                              | 0.1-10 µg L <sup>-1</sup><br>(1.3-46 ng L <sup>-1</sup> )      | 16 |
| Acetic anhydride                                                                                          | GC-ECD | Water (chlorophenols)                             | Coupled SPE (PS-DVB, 100 mg) and dispersive                                                                                                                           | 0.001-20 µg L <sup>-1</sup>                                    | 17 |

|                                                                                                                                                                       |       |                       |                                                                                                                                                                    |                                                            |           |
|-----------------------------------------------------------------------------------------------------------------------------------------------------------------------|-------|-----------------------|--------------------------------------------------------------------------------------------------------------------------------------------------------------------|------------------------------------------------------------|-----------|
|                                                                                                                                                                       |       |                       | LLME; 100 mL aqueous sample; 0.5 $\mu\text{L}$ of 13 $\mu\text{L}$ extract injected.                                                                               | (0.5-100 $\text{ng L}^{-1}$ )                              |           |
| <p><i>N</i>-(<i>tert</i>-Butyldimethylsilyl)-<i>N</i>-methyl-trifluoroacetamide</p> 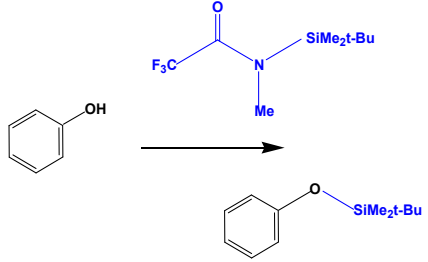 | GC-MS | Water (chlorophenols) | Electromembrane extraction followed by ultrasound assisted emulsification extraction; 100 mL aqueous sample; 1 $\mu\text{L}$ of 30 $\mu\text{L}$ extract injected. | 0.05-10 $\mu\text{g L}^{-1}$<br>(5-20 $\text{ng L}^{-1}$ ) | 18        |
| <p>Dimethyl sulphate</p>                                                             | GC-MS | Water (chlorophenols) | Coupled HS-SDME (1-butanol, 10 $\mu\text{L}$ ) and HS-SPME (DVB/CAR/PDMS); up to 2 mL of aqueous sample.                                                           | 0.001-5 $\text{mg L}^{-1}$<br>(8-45 $\text{ng L}^{-1}$ )   | This work |

LOD, limit of detection; SPME, solid-phase microextraction; HS-SPME, headspace solid-phase microextraction; CW-DVB, carbowax-divinylbenzene; SPE, solid-phase extraction; PS-DVB, polystyrene-divinylbenzene; SDME, single drop microextraction; LLE, liquid-liquid extraction; CSDFME, continuous sample drop flow microextraction; dispersive LLME, dispersive liquid-liquid microextraction; HF-LLLME, hollow fiber liquid-liquid-liquid microextraction; PDMS, polydimethylsiloxane; CAR-PDMS, carboxene-polydimethylsiloxane; DVB/CAR/PDMS, divinylbenzene/carboxene/polydimethylsiloxane.

## References

- 1 H. Bagheri, A. Mir and E. Babanezhad, *Anal. Chim. Acta*, 2005, 532, 89-95.
- 2 M. T. Garcia-Valverde, R. Lucena, S. Cardenas and M. Valcarcel, *J. Chromatogr. A*, 2016, 1464, 42-49.

- 3 F. J. Conde, A. M. Afonso, V. Gonzalez and J. H. Ayala, *Anal. Bioanal. Chem.*, 2006, 385, 1162-1171.
- 4 S. Mishra, A. Jain and K. K. Verma, *Analyst*, 2001, 126, 1663-1668.
- 5 L. Schmidt and T. Goen, *Anal. Chim. Acta*, 2017, 965, 123-130.
- 6 A. Kovacs, M. Mortl and A. Kende, *Microchem. J.*, 2011, 99, 125-131.
- 7 H.-B. Lee, T. E. Peart and M. L. Svoboda, *J. Chromatogr. A*, 2005, 1094, 122-129.
- 8 M. Saraji and M. Bakhshi, *J. Chromatogr. A*, 2005, 1098, 30-36.
- 9 Y. Liu, B. Wen and X.-q. Shan, *Talanta*, 2006, 69, 1254-1259.
- 10 Y. C. Fiamegos, C. G. Nanos, G. A. Pilidis and C. D. Stalikas, *J. Chromatogr. A*, 2003, 983, 215-223.
- 11 M. Karimaei, K. Sharafi, M. Moradi, H. R. Ghaffari, H. Biglari, H. Arfaeinia and N. Fattahi, *Anal. Methods*, 2017, 9, 2865-2872.
- 12 N. Fattahi, Y. Assadi, M. R. M. Hosseini and E. Z. Jahromi, *J. Chromatogr. A*, 2007, 1157, 23-29.
- 13 C. Pizarro, C. Saenz-Gonzalez, N. Perez-del-Notario, J. M. Gozalez-Saiz, *J. Chromatogr. A*, 2010, 1217, 7630-7637.
- 14 M. Saraji and M. Ghani, *J. Chromatogr. A*, 2015, 1418, 45-53.
- 15 M. Llompert, M. Lourido, P. Landin, C. Garcia-Jares and R. Cela, *J. Chromatogr. A*, 2002, 963, 137-148.
- 16 M. Polo, M. Llompert, C. Gargia-Jares, G. Gomez-Noya, M.-H. Bollain and R. Cela, *J. Chromatogr. A*, 2006, 1124, 11-21.
- 17 N. Fattahi, S. Samadi, Y. Assadi and M. R. M. Hosseini, *J. Chromatogr. A*, 2007, 1169, 63-69.
- 18 G. Gao and H. K. Lee, *J. Chromatogr. A*, 2012, 1243, 14-22.

**Table S2.** Structures of phenols and their methyl derivatives, and their recorded/library EI mass spectra

| No. | Phenols                                                                                                   | Methyl ethers                                                                                              | Electron ionization mass spectra of derivatives                                      |
|-----|-----------------------------------------------------------------------------------------------------------|------------------------------------------------------------------------------------------------------------|--------------------------------------------------------------------------------------|
| 1   | Phenol<br>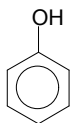               | Anisole<br>               |    |
| 2   | 2-Cresol<br>             | 2-Methylanisole<br>       |    |
| 3   | 4-Cresol<br>             | 4-Methylanisole<br>       |    |
| 4   | 2,6-dimethylphenol<br> | 2,6-Dimethylanisole<br> |  |
| 5   | 2,5-dimethylphenol<br> | 2,5-Dimethylanisole<br> |  |
| 6   | 2,3-Dimethylphenol<br> | 2,3-Dimethylanisole<br> |  |
| 7   | 3,4-Dimethylphenol<br> | 3,4-Dimethylanisole<br> |  |

|    |                                                                                                                     |                                                                                                                     |                                                                                                                                          |
|----|---------------------------------------------------------------------------------------------------------------------|---------------------------------------------------------------------------------------------------------------------|------------------------------------------------------------------------------------------------------------------------------------------|
| 8  | <p>2,4,6-Trimethylphenol</p> 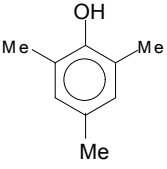      | <p>2,4,6-Trimethylanisole</p>      |  <p>Abundance</p> <p>m/z</p> <p>Library spectrum</p>   |
| 9  | <p>2-Isopropyl-5-methylphenol</p>  | <p>2-Isobutyl-5-methylanisole</p>  |  <p>Abundance</p> <p>m/z</p> <p>Library spectrum</p>   |
| 10 | <p>2,4,6-Trichlorophenol</p>       | <p>2,4,6-Trichloroanisole</p>      |  <p>Abundance</p> <p>m/z</p> <p>Library spectrum</p>   |
| 11 | <p>1-Naphthol</p>                | <p>1-Methoxynaphthalene</p>      |  <p>Abundance</p> <p>m/z</p> <p>Library spectrum</p>  |
| 12 | <p>4-Phenylphenol</p>            | <p>4-Methoxybiphenyl</p>         |  <p>Abundance</p> <p>m/z</p> <p>Library spectrum</p> |
| 13 | <p>Pentachlorophenol</p>         | <p>Pentachloroanisole</p>        |  <p>Abundance</p> <p>m/z</p> <p>Library spectrum</p> |
